# Supplementary material for: Glioblastoma Subclasses Can Be Defined by Activity among Signal Transduction Pathways and Associated Genomic Alterations
Source: PLoS One. 2009 Nov 13;4(11):e7752. doi: 10.1371/journal.pone.0007752 (PMC2771920; doi:10.1371/journal.pone.0007752)
Supplement: Table S2 — Quantified western results. Western bands quantified by densitometry and normalized to actin (see Methods). Images of selected bands are shown in Figure S1. (0.05 MB XLS) [file pone.0007752.s009.xls]

## Sheet: 2a
	Supplementary Table 2a: Quantified western results
	Sample ID	EGFR	p-EGFR	PDGF-B	PDGFR-B	p-PDGFR-B	IRS-1	Akt	p-Akt	p-GSK3b	p-Bad	p-NFkB	p-S6K	eIF4E	p-eIF4E	4E-BP1	p-4E-BP1
	GBM.1	1506.77	23.4046	30.4569	1329.66	184.018	952.623	2174.28	1351.95	1571.07	494.924	37.225	869.712	647.208	84.0063	343.486	1278.34
	GBM.2	19.4022	7.87063	173.571	1309.3	95.3321	1124.8	913.477	1904.04	1446.78	459.885	73.9381	334.557	637.126	77.499	1305.72	2065.55
	GBM.3	31.2094	18.0509	2330.95	202.948	325.854	100.13	697.009	1485.05	1940.83	326.398	1243.17	1090.38	453.186	64.9233	66.9701	300.39
	GBM.4	56.1283	16.9119	1388.89	184.246	158.044	137.457	1015.46	995.991	737.686	186.14	288.087	227.377	188.431	130.405	51.5464	250.859
	GBM.5	404.152	122.947	1623.53	99.0734	323.798	181.315	1061.59	1845.67	1496.19	295.502	810.381	730.796	443.599	102.882	215.917	1510.73
	GBM.6	2351.25	2779.6	120.921	125.693	55.4308	92.7703	1293.03	1069.74	2354.45	498.401	47.9846	760.077	653.871	139.316	1300.7	1485.6
	GBM.7	203.114	142.131	1668.79	385.986	2001.72	98.3723	1433.12	1557.68	1748.05	297.948	707.714	1320.59	290.163	273.946	125.265	291.578
	GBM.8	2776.91	189.377	358.517	797.916	1440.98	203.849	1494.65	2421.95	1920.88	548.111	583.749	1134.71	927.299	237.82	660.014	2091.95
	GBM.9	179.31	43.2982	57.6803	364.419	476.656	989.342	749.216	1647.65	937.304	313.48	64.5768	112.226	434.483	359.519	628.84	1435.11
	GBM.10	2435.43	574.284	105.477	371.185	36.629	157.539	1283.98	2636.92	2173.77	739.013	331.981	1035.16	1144.02	175.395	1329.28	2529.41
	GBM.11	192.982	97.3368	1468.49	516.513	189.057	139.051	894.087	1740.74	2288.5	423.002	1072.12	1633.53	688.109	133.017	181.936	455.491
	GBM.12	771.318	79.4826	804.264	494.52	617.482	355.943	864.987	1479.33	1476.74	408.269	1042.64	837.855	528.424	300.128	278.424	1671.19
	GBM.13	2464.44	1757.59	85.9189	415.027	260.816	492.124	1667.78	1215.75	1572.79	393.795	200.477	1058.71	1022.43	297.926	1010.02	2037.71
	GBM.14	101.597	17.3258	2122.64	503.092	542.883	870.827	1178.52	223.512	1112.48	590.711	300.435	66.7634	323.657	89.2058	195.936	1497.1
	GNT.15	73.3662	13.1887	517.263	35.1832	0.875647	634.402	208.385	89.3958	101.11	399.507	67.8175	30.2096	19.1122	188.069	504.316	1474.72
	GBM.16	90.4977	101.19	2524.13	432.563	1344.25	427.602	2070.14	1314.48	1877.83	371.795	2128.96	711.916	536.199	465.884	246.606	337.858
	GBM.17	980.78	128.427	444.38	650.267	841.672	322.073	978.451	2744.9	2591.15	674.432	710.542	649.971	1357.02	82.5318	1776.35	384.391
	GBM.18	78.7508	110.023	2830.28	795.47	743.604	393.754	1998.64	2380.18	2606.25	415.479	2554.65	1552.61	835.709	109.417	459.606	824.168
	GBM.19	109.074	24.7722	133.822	291.807	522.786	886.343	1602.2	639.78	1044.91	342.805	90.7424	33.9138	385.885	187.401	338.222	2990.83
	GBM.20	97.5936	29.8118	22.7273	546.59	116.09	1287.43	1765.37	559.492	437.834	266.043	9.35829	4.0107	469.251	120.473	393.717	1920.45
	AO.21	1291.75	107.216	27.8351	628.769	450.293	263.918	1555.67	1683.51	1371.65	307.216	88.6598	297.423	800	135.737	616.495	319.588
	ODG.22	3959.43	509.196	60.8482	632.001	332.879	322.065	1173.33	2863.55	2286.42	370.621	305.47	826.06	947.142	129.401	781.807	7512.6
	AA.23	168.051	77.6815	2308.63	909.591	641.563	76.0383	1624.92	2394.25	2187.22	271.565	1633.87	1410.86	632.588	263.3	167.412	1700.96
	AO.24	23.8624	78.3291	1920.09	718.853	736.424	189.789	1327.41	1818.53	2116.54	236.959	763.596	1181.47	452.275	81.0166	219.201	2715.32
	ODG.25	15.0457	39.8216	2213.86	583.909	629.861	442.235	1464.8	1054.27	1864.59	253.09	1069.32	809.78	570.661	74.2031	109.081	621.709
	AA.26	16.8185	7.96391	784.163	232.911	650.694	838.122	866.153	2060.97	1814.3	317.449	138.753	91.801	408.549	230.778	413.455	1054.66
	GBM.27	120.962	34.6914	1611.57	300.128	393.971	375.282	1325.32	1193.84	999.624	283.246	883.171	735.537	483.095	178.76	308.415	283.246

## Sheet: 2b
	Supplementary Table 2b
	Sample ID	Kras-GTP	Raf-B	p-Raf-B	Mek	p-Mek	Erk	p-Erk	Jagged1	Delta1	Notch1 FL	Notch1 ICD	Notch2 FL	Notch2 ICD	Hes1	p16	p21	p27	p53	p-Rb
	GBM.1	2259.73	1257.19	487.31	640.343	970.389	1126.9	1469.54	1737.73	875.635	984.772	1796.11	310.491	1417.09	793.138	186.971	160.745	351.1	480.541	615.059
	GBM.2	1316.73	1091.77	121.133	684.392	672.26	587.31	842.16	943.891	1023.6	945.464	888.306	524.384	1480.86	330.014	1576.3	986.89	341.374	2672.78	99.1085
	GBM.3	1474.64	1728.22	33.1599	998.435	1084.53	1135.89	1151.5	161.248	96.8791	122.237	785.436	59.1678	1027.31	10.474	552.666	130.039	278.283	317.295	221.066
	GBM.4	1802.41	1267.47	44.1008	850.309	836.197	899.771	985.109	237.113	487.4	85.9107	126.002	35.5097	305.269	7.20475	10.3093	64.7194	117.411	143.757	22.9095
	GBM.5	1365.4	1260.9	124.567	743.558	891.349	1011.07	1188.24	1775.78	251.903	198.616	647.751	94.1176	1195.16	309.642	22.1453	256.747	114.187	169.55	457.439
	GBM.6	599.488	1373.64	95.3295	936.046	166.347	1109.4	361.484	2389.64	1567.5	74.856	548.944	13.4357	76.7754	392.456	40.9469	92.1305	1692.26	85.7326	294.946
	GBM.7	627.742	2096.96	70.7714	1124.48	1021.23	1475.58	1189.67	418.967	74.31	193.914	622.788	65.8174	1406.94	120.41	50.9554	115.357	1102.62	148.62	375.088
	GBM.8	1101.92	2067	297.22	756.881	945.83	908.054	759.088	1833.93	957.947	565.217	1195.3	192.445	1651.46	1098.27	57.0207	244.476	1083.39	1707.77	1799
	GBM.9	924.138	1352.98	206.27	541.186	909.718	505.956	760.502	709.718	819.436	213.793	344.828	144.201	1572.41	437.249	1358.62	73.3542	258.934	249.53	428.84
	GBM.10	1958.08	1900.61	366.464	1004.14	880.325	965.517	1102.77	1970.93	1438.81	275.186	1192.02	132.522	1699.8	873.301	92.6302	359.703	1609.2	546.991	2267.07
	GBM.11	150.747	1915.53	91.6179	1256.06	929.825	1395.06	1272.9	463.938	211.176	127.355	805.718	57.18	483.431	70.686	50.0325	144.25	1333.98	144.25	523.717
	GBM.12	1301.68	1584.63	191.86	1055.14	972.868	1135.66	1167.96	653.747	666.021	187.984	1018.09	110.465	962.532	92.7	88.5013	479.974	615.633	1417.96	428.941
	GBM.13	1147.02	1168.97	584.248	789.203	865.871	592.84	666.348	1766.11	1272.55	377.088	934.129	276.85	1204.77	1161.59	161.337	783.294	757.518	544.63	1558
	GBM.14	1481.13	2268.51	409.289	987	918.723	851.959	1037.74	48.6212	597.968	108.853	213.353	68.9405	251.089	87.7069	94.3396	195.21	146.589	232.221	26.8505
	GNT.15	1012.95	130.086	141.184	191.678	51.7879	151.665	190.506	16.6461	531.443	43.7731	117.139	16.6461	16.0296	17.3935	128.237	61.6523	54.254	97.4106	15.4131
	GBM.16	2150.83	2711.92	245.852	1252.71	1197.59	1740.57	1541.48	312.217	690.045	184.766	721.719	117.647	875.566	67.1559	33.9367	133.484	330.317	278.281	553.544
	GBM.17	968.55	1935.35	500.291	1043.82	1438.56	1480.49	1566.69	2002.91	1898.66	906.814	1436.81	258.008	842.749	772.738	31.4502	493.885	1118.23	1407.69	3556.2
	GBM.18	948.405	2923.96	99.1174	1440.5	1535.64	2477.26	2044.81	399.864	484.046	128.988	879.158	45.4854	495.587	53.045	213.17	164.969	1205.02	216.565	1420.91
	GBM.19	909.258	971.586	395.967	579.815	1174.15	1760.77	1643.45	1083.41	912.924	1424.38	125.573	307.974	148.488	254.441	120.073	135.655	29.3309	461.045	263.978
	GBM.20	960.561	697.193	123.663	561.292	455.882	969.251	757.353	435.16	707.219	1026.74	125.668	228.61	232.62	97.5519	2799.47	580.214	46.7914	160.428	112.299
	AO.21	119.588	1330.93	146.907	743.537	767.526	1195.88	1187.63	334.021	536.598	166.495	397.423	175.773	888.144	332.321	1410.31	661.34	581.959	777.32	1215.46
	ODG.22	111.862	1776.28	229.256	853.241	708.052	1472.65	1192.99	1188.08	816.841	531.653	1220.04	208.359	952.674	793.719	1785.49	141.364	1062.69	69.453	1981.56
	AA.23	860.064	2186.58	213.419	1119.33	1001.28	1684.98	1389.14	581.47	510.543	98.4026	750.16	60.0639	741.853		144.409	48.5623	463.898	53.6741	1702.88
	AO.24	473.363	1923.97	258.602	1237.76	669.256	1674.25	1397.34	257.492	157.603	201.998	937.847	71.5871	568.812		49.9445	104.883	1059.38	49.9445	1000
	ODG.25	211.177	1774.31	310.586	1289.62	674.906	1625.47	1102.63	96.7222	19.8818	57.496	250.403	31.7034	117.141	200.196	262.762	57.496	705.535	11.2843	131.65
	AA.26	1531.89	1114.93	714.786	914.919	646.111	1547.3	1049.75	305.536	262.088	118.43	398.038	67.9748	194.814	447.721	535.389	41.3455	228.451	2175.89	1090.4
	GBM.27	579.639	1878.66	279.865	944.282	874.906	888.805	716.379	157.776	28.55	129.226	512.772	120.962	202.104	395.577	57.8512	94.29	338.843	182.569	571.751

## Sheet: 2c
	Supplementary Table 2c
	Sample ID	INI1	Shh	Pten	b-catenin	YKL-40	c-Myc	La	Rheb	TSC1	TSC2	mTOR	S6K	p-FKHR	VEGF	FGF2	HEB1	HEB2	N-myc	Cyclin D	IGFBP5	NF1
	GBM.1	1198.82	998.308	528.765	1661.59	2888.32	619.289	810.491	513.536	1368.02	427.242	73.6041	461.929	125.212	3828.63	692.608	475.857	340.457	436.56	15.4726	45.3177	6950
	GBM.2	1261.67	33.0362	320.923	650.236	622.968	196.644	753.54	798.637	868.904	124.803	42.9995	182.486	130.047	1151.64	521.559	948.622	200.969	498.272	62.5719	17.6581	2674
	GBM.3	651.495	567.62	758.127	142.393	847.204	147.594	499.35	180.754	1637.19	159.298	61.1183	1232.77	501.3	408.39	212.109	913.086	616.786	84.5787	1.09428	9.78479	3203
	GBM.4	503.436	357.388	686.712	68.7285	1844.22	69.874	337.342	78.4651	310.997	32.0733	20.0458	214.777	258.305	397.191	95.6021	421.948	349.378	130.245	5.65498	83.0765	1066
	GBM.5	482.353	706.574	467.128	613.149	1155.02	769.55	513.495	232.526	1303.81	207.612	67.128	250.519	303.806	819.584	447.712	490.732	402.765	400.669	14.1706	54.8567	2287
	GBM.6	92.1305	969.29	157.39	1133.08	837.492	127.319	732.566	729.367	297.505	37.7479	9.59693	175.944	67.8183	832.976	711.847	752.383	346.315	401.123	16.7977	17.35	1619
	GBM.7	492.569	784.147	802.548	298.655	1034.68	809.625	456.476	150.743	1821.66	356.688	106.157	801.84	511.677	928.268	388.629	1367.19	1775.34	302.227	24.2584	10.0704	8123
	GBM.8	1282.25	753.386	650.748	719.886	1379.9	564.505	898.788	761.939	1934.43	443.336	109.765	252.316	334.996	1224.04	563.978	1902.37	654.134	624.135	52.1414	3.55773	3450
	GBM.9	757.994	65.8307	300.313	554.232	1372.41	2118.5	495.925	225.705	971.16	110.345	20.6897	10.0313	143.574	975.753	471.504	580.564	324.492	750.908	8.7931	392.818	22
	GBM.10	1198.11	724.138	290.737	1261.66	971.602	653.144	1055.44	736.984	1779.58	524.003	171.738	365.788	388.776	904.065	741.388	1526.43	192.55	839.242	36.1862	9.26842	7759
	GBM.11	549.708	1097.47	789.474	478.233	274.854	178.038	620.533	170.24	912.281	222.222	51.332	1374.92	419.103	740.959	323.979	1191.71	710.057	300.957	16.8774	2.27518	6918
	GBM.12	858.527	427.003	439.276	919.251	522.61	1939.28	651.163	361.757	1445.74	236.434	28.4238	896.641	461.886	2022.66	304.384	678.588	680.914	121.651	50.8452	7.50775	4497
	GBM.13	1655.37	514.081	710.74	1732.22	252.029	21.0024	1032.46	745.107	1248.69	515.036	104.535	1391.41	515.513	1042.05	487.164	1126.59	177.895	347.456	77.9509	61.8759	2070
	GBM.14	173.44	724.238	431.06	883.164	1150.22	1325.83	123.367	155.298	655.298	78.3745	61.6836	248.186	78.3745	3423.11	319.804	1093.27	1401.44	345.061	42.1874	16.8011	4700
	GNT.15	26.5105	85.0801	39.4575	421.085	190.506	991.985	4.93218	98.0271	39.4575	14.7965	3.08261	29.5931	21.5783	1947.3	176.306	213.674	816.846	1084.17	2.25148	1.05962	0
	GBM.16	487.934	1077.68	932.881	519.608	1031.67	1287.33	469.834	149.321	2252.64	292.609	190.045	1460.78	718.703	1795.74	436.437	2325.93	3046.84	1163.22	90.9588	8.92059	9116
	GBM.17	1365.75	1025.04	468.841	924.869	97.2627	104.252	993.011	739.08	2111.82	949.913	553.873	610.949	1044.85	635.688	703.175	2272.58	420.224	422.767	605.134	60.6482	8608
	GBM.18	758.995	1355.06	1635.44	468.432	367.278	291.921	751.527	285.811	2599.46	887.984	514.596	1893.41	1131.03	1065.55	630.115	2769.59	3051.24	734.406	88.8501	11.9426	6534
	GBM.19	274.977	308.891	182.401	219.065	2327.22	319.89	503.208	197.984	935.839	123.74	169.569	43.9963	266.728	3269.11	694.533	1453.09	711.884	2149.62	31.1208	47.4456	0
	GBM.20	350.267	453.209	354.278	59.492	1651.74	864.973	650.401	163.102	320.187	43.4492	134.358	0.668449	100.936	1906.42	525.844	467.392	137.667	1229.82	81.1504	5.87948	0
	AO.21	912.371	596.392	708.763	490.722	392.268	131.443	898.454	393.814	1545.36	453.608	517.01	296.907	535.567	976.36	635.553	1393.49	143.67	619.875	150.797	34.7075	12475
	ODG.22	894.284	755.378	358.328	989.551	1307.93	488.015	1064.54	452.981	657.037	468.347	624.462	1124.15	767.056	1996.17	722.057	1837.18	285.908	814.731	79.7122	42.5652	12754
	AA.23	724.601	1139.94	1276.68	772.524	823.003	847.284	677.955	321.406	1772.52	515.655	587.22	1695.21	791.693	1665.34	631.203	2472.3	1442.29	989.441	28.8847	15.6334	9070
	AO.24	597.114	930.633	1116.54	603.219	226.97	86.5705	608.213	289.123	1437.85	537.736	509.989	1632.08	907.88	1282.88	536.078	2092.79	1477.37	499.53	253.432	67.9984	10192
	ODG.25	382.053	917.249	1070.39	907.577	61.2574	159.592	361.634	143.471	1392.26	471.252	300.913	1532.51	527.136	1550.83	448.735	1868.26	1480.42	581.637	21.5326	17.0039	9037
	AA.26	691.661	318.851	469.516	1074.28	143.658	1304.13	256.482	306.237	1025.93	241.065	114.226	134.548	208.83	3689.04	322.376	1844.27	933.208	836.796	158.252	24.5842	2003
	GBM.27	466.942	787.378	513.899	745.68	886.927	34.1848	442.524	335.838	971.45	551.841	328.7	1276.11	754.32	1027.66	435.232	1234.69	1040.74	198.242	73.7055	59.9014	6125
