# Supplementary material for: Glioblastoma Subclasses Can Be Defined by Activity among Signal Transduction Pathways and Associated Genomic Alterations
Source: PLoS One. 2009 Nov 13;4(11):e7752. doi: 10.1371/journal.pone.0007752 (PMC2771920; doi:10.1371/journal.pone.0007752)
Supplement: Table S3 — Summary of integrated analysis of genomic data from 278 samples in The Cancer Genome Atlas. In this table, mutations are denoted in blue and designated “validated” and “unvalidated” according to whether TCGA reports that the mutation was verified by second sequencing method or whether such verification is pending. Focal amplifications in red and single-copy loss or homozygous deletion (light and dark green, respectively) are inferred from array-CGH log2 ratios (see Methods). Cluster assignments are derived from Figure 4. (0.08 MB XLS) [file pone.0007752.s010.xls]

## Sheet: Table
		Supplementary Table 3: Summary of integrated analysis of genomic data from 278 samples in The Cancer Genome Atlas.
		TCGA patient ID	ACGH TCGA sample ID	Expression TCGA sample ID	NF1 expression	NF1 mutation	NF1 CNA	NF1 CNA Class	EGFR CNA	PDGFRA CNA	MET CNA	Chr7
		1	TCGA-02-0001-01C-01D	TCGA-02-0001-01C-01R-0177-01	-0.98	unvalidated	-0.1077	intact	0.8	0	0.8	0.7852
		2	TCGA-02-0002-01A-01D	TCGA-02-0002-01A-01R-0177-01	-0.66		-0.1795	intact	0.1	0	0.1	0.1467
		3	TCGA-02-0003-01A-01D	TCGA-02-0003-01A-01R-0177-01	-0.07	none	-0.0015	intact	5.1	0	0.5	0.5173
		4		TCGA-02-0004-01A-01R-0298-01	-0.81	none
		6	TCGA-02-0006-01B-01D	TCGA-02-0006-01B-01R-0177-01	-0.58	none	0.0293	intact	0.4	0	0.4	0.3868
		7	TCGA-02-0007-01A-01D	TCGA-02-0007-01A-01R-0177-01	-0.39	none	0.0145	intact	0.9	0	0	0.0437
		9	TCGA-02-0009-01A-01D	TCGA-02-0009-01A-01R-0177-01	0.82	none	0.0206	intact	6	0	0.5	0.5146
		10	TCGA-02-0010-01A-01D	TCGA-02-0010-01A-01R-0177-01	0.38	validated	0.116	intact	0.1	0	1.1	0.108
		11	TCGA-02-0011-01B-01D	TCGA-02-0011-01B-01R-0177-01	0.22	none	0.0204	intact	0	0	0	0.0424
		14	TCGA-02-0014-01A-01D	TCGA-02-0014-01A-01R-0177-01	1	none	0.0523	intact	0.1	2.7	0.1	0.0619
		15	TCGA-02-0015-01A-01G	TCGA-02-0015-01A-01R-0298-01	-1.71	unvalidated	0.0125	intact	0.4	0	0.5	0.4564
		16	TCGA-02-0016-01A-01G	TCGA-02-0016-01A-01R-0298-01	1.6	none	0.0017	intact	3.1	0	0.4	0.4368
		21	TCGA-02-0021-01A-01D	TCGA-02-0021-01A-01R-0177-01	-0.59	none	-0.0006	intact	6	0	0.5	0.5023
		23	TCGA-02-0023-01B-01G	TCGA-02-0023-01B-01R-0298-01	0.11	none	-0.0033	intact	4.4	0	0.1	0.4182
		24	TCGA-02-0024-01B-01D	TCGA-02-0024-01B-01R-0177-01	-0.25	none	0.0713	intact	0	3.6	2	-0.24
		25	TCGA-02-0025-01A-01G	TCGA-02-0025-01A-01R-0298-01	-1.02	none	-0.0264	intact	0.2	0	0.3	0.3071
		26	TCGA-02-0026-01B-01G	TCGA-02-0026-01B-01R-0298-01	1.03	none	0.0591	intact	0	0	0	0.0384
		27	TCGA-02-0027-01A-01D	TCGA-02-0027-01A-01R-0177-01	-0.01	none	0.0285	intact	0.3	0	0.3	0.3304
		28	TCGA-02-0028-01A-01D	TCGA-02-0028-01A-01R-0177-01	-0.96	validated	0.0353	intact	0	0	0	0.0312
		33	TCGA-02-0033-01A-01D	TCGA-02-0033-01A-01R-0177-01	-1.31	validated	-0.2201	loss	0.3	0	0.3	0.2613
		34	TCGA-02-0034-01A-01D	TCGA-02-0034-01A-01R-0177-01	-1.02	none	0.014	intact	0.3	0	0.3	0.3163
		37	TCGA-02-0037-01A-01D	TCGA-02-0037-01A-01R-0177-01	-0.01	none	-0.0063	intact	0.5	0	0.5	0.4833
		38	TCGA-02-0038-01A-01D	TCGA-02-0038-01A-01R-0177-01	-0.14	none	0.0051	intact	5.8	0	0.5	0.4783
		39	TCGA-02-0039-01A-01G	TCGA-02-0039-01A-01R-0298-01	-1.8	unvalidated	0.0003	intact	0	0	0	0.0419
		43	TCGA-02-0043-01A-01D	TCGA-02-0043-01A-01R-0177-01	0.51	none	0.0104	intact	5.8	0	0.5	0.5299
		46	TCGA-02-0046-01A-01D	TCGA-02-0046-01A-01R-0177-01	0.44	none	0.0097	intact	4.5	0	0.5	0.5147
		47	TCGA-02-0047-01A-01D	TCGA-02-0047-01A-01R-0177-01	-0.2	none	-0.0014	intact	0	0	0	0.0039
		48	TCGA-02-0048-01A-01G	TCGA-02-0048-01A-01R-0298-01	1.12	none	0.0324	intact	4.1	0	0	0.049
		51	TCGA-02-0051-01A-01G	TCGA-02-0051-01A-01R-0298-01	-1.28		0.123	intact	0.6	-0.1	0.3	0.3541
		52	TCGA-02-0052-01A-01D	TCGA-02-0052-01A-01R-0177-01	-1.03	none	0.0138	intact	0.2	0	0.3	0.2496
		54	TCGA-02-0054-01A-01D	TCGA-02-0054-01A-01R-0177-01	-0.33	none	0.0159	intact	0.6	-0.1	0.6	0.6205
		55	TCGA-02-0055-01A-01D	TCGA-02-0055-01A-01R-0177-01	-1.91	none	-1.2112	del	0.1	0	0.1	0.1471
		57	TCGA-02-0057-01A-01D	TCGA-02-0057-01A-01R-0177-01	-0.27	none	0.0176	intact	0.2	0	0.2	0.242
		58	TCGA-02-0058-01A-01D	TCGA-02-0058-01A-01R-0177-01	-0.32	none	0.0558	intact	0	0	0	0.039
		59	TCGA-02-0059-01A-01G	TCGA-02-0059-01A-01R-0298-01	-1.45		-0.1957	intact	0.3	0	0.3	0.3014
		60	TCGA-02-0060-01A-01D	TCGA-02-0060-01A-01R-0177-01	0.1	none	-0.0129	intact	0	-0.3	0	0.0464
		64	TCGA-02-0064-01A-01D	TCGA-02-0064-01A-01R-0202-01	1.39	none	0.0179	intact	4.8	0	0.4	0.4064
		68	TCGA-02-0068-01A-01G	TCGA-02-0068-01A-01R-0298-01	0.76	none	0.0121	intact	5	0	0	0.0168
		69	TCGA-02-0069-01A-01D	TCGA-02-0069-01A-01R-0202-01	4.48	none	0.0184	intact	0.2	1.4	-0.1	-0.0525
		70	TCGA-02-0070-01A-01G	TCGA-02-0070-01A-01R-0298-01	-0.9	unvalidated	-0.0146	intact	0.4	0	0.4	0.3593
		71	TCGA-02-0071-01A-01D	TCGA-02-0071-01A-01R-0202-01	1.76	none	0.0582	intact	4.9	0	0.4	0.4228
		74	TCGA-02-0074-01A-01D	TCGA-02-0074-01A-01R-0202-01	2.11	none	-0.049	intact	0.3	3.9	0.3	0.2996
		75	TCGA-02-0075-01A-01D	TCGA-02-0075-01A-01R-0202-01	-0.71	validated	-0.0119	intact	0.5	0.2	0.5	0.5203
		79	TCGA-02-0079-01A-01D	TCGA-02-0079-01A-03R-0306-01	-1.02	none	-0.2887	loss	0.3	1.4	0.3	0.2806
		80	TCGA-02-0080-01A-01D	TCGA-02-0080-01A-01R-0202-01	1.82	none	0.0272	intact	0	0	0.8	0.8377
		83	TCGA-02-0083-01A-01D	TCGA-02-0083-01A-01R-0202-01	0.17	none	0.0595	intact	4.5	0	0	0.0572
		84	TCGA-02-0084-01A-01D	TCGA-02-0084-01A-03R-0306-01	0.67	none	0.0767	intact	0	0	0	0.0477
		85	TCGA-02-0085-01A-01D	TCGA-02-0085-01A-01R-0202-01	0.07	none	0.0338	intact	0.3	0	0.3	0.2833
		86	TCGA-02-0086-01A-01D	TCGA-02-0086-01A-01R-0202-01	-1.39	validated	-0.2378	loss	0.5	0	0.5	0.528
		87	TCGA-02-0087-01A-01D	TCGA-02-0087-01A-01R-0280-01	0.82		-0.0354	intact	0.4	0	0.4	0.4107
		89	TCGA-02-0089-01A-01D	TCGA-02-0089-01A-01R-0202-01	0.3	none	-0.0063	intact	5	0	0.4	0.3952
		99	TCGA-02-0099-01A-01D	TCGA-02-0099-01A-01R-0202-01	0.51	none	0.0333	intact	0.4	0	0.5	0.4568
		102	TCGA-02-0102-01A-01D	TCGA-02-0102-01A-01R-0202-01	0.73	none	0.0277	intact	6.1	0	0.5	0.513
		104	TCGA-02-0104-01A-01G	TCGA-02-0104-01A-01R-0298-01	-0.16	none	0.1359	intact	0	0	0	0.028
		106	TCGA-02-0106-01A-01D	TCGA-02-0106-01A-01R-0280-01	-1.15		-0.1561	intact	4	-0.1	0.9	0.872
		107	TCGA-02-0107-01A-01D	TCGA-02-0107-01A-01R-0202-01	-0.34	validated	0.0759	intact	0.2	0	0.2	0.1859
		111	TCGA-02-0111-01A-01D	TCGA-02-0111-01A-01R-0280-01	-0.88		-0.3923	loss	0.3	0	0.3	0.3062
		113	TCGA-02-0113-01A-01D	TCGA-02-0113-01A-01R-0202-01	-0.28	none	-0.0408	intact	0.6	0.5	0.6	0.5521
		114	TCGA-02-0114-01A-01D	TCGA-02-0114-01A-01R-0202-01	3.06	none	0.0687	intact	0.1	0	0.1	0.0563
		115	TCGA-02-0115-01A-01D	TCGA-02-0115-01A-01R-0202-01	-1.23	validated	-0.4092	loss	0.4	0.1	0.4	0.4028
		116	TCGA-02-0116-01A-01D	TCGA-02-0116-01A-01R-0224-01	-1.09	none	0.1058	intact	4.4	0	0.5	0.5309
		117		TCGA-02-0117-01A-01R-0219-01	0.57
		122	TCGA-06-0122-01A-01D	TCGA-06-0122-01A-01R-0219-01	0.58	none	-0.0054	intact	4.8	0	0	0.0179
		124	TCGA-06-0124-01A-01D	TCGA-06-0124-01A-01R-0219-01	-1.18	validated	0.039	intact	2.6	0	0.4	0.3769
		125	TCGA-06-0125-01A-01D	TCGA-06-0125-01A-01R-0219-01	0.42	none	-0.0346	intact	5.4	0	0.5	0.5439
		126	TCGA-06-0126-01A-01D	TCGA-06-0126-01A-01R-0219-01	0.87	none	0.0138	intact	6.3	0	0.5	0.5222
		127	TCGA-06-0127-01A-01D	TCGA-06-0127-01A-01R-0306-01	0.22	none	0.0369	intact	4	0	0	0.036
		128	TCGA-06-0128-01A-01D	TCGA-06-0128-01A-01R-0219-01	1.44	none	0.0144	intact	0.1	0	0.1	0.0682
		129	TCGA-06-0129-01A-01D	TCGA-06-0129-01A-01R-0219-01	1.99	none	0.1102	intact	0.1	0	0.1	0.0607
		130	TCGA-06-0130-01A-01D	TCGA-06-0130-01A-01R-0219-01	-0.77	none	-0.2363	loss	0.4	0.1	0.4	0.3785
		132	TCGA-06-0132-01A-02D	TCGA-06-0132-01A-02R-0233-01	-0.08	none	-0.032	intact	3.8	0	0.2	0.1876
		133	TCGA-06-0133-01A-02D	TCGA-06-0133-01A-02R-0219-01	-0.42	none	-0.0012	intact	5.2	0	0.7	0.6857
		137	TCGA-06-0137-01A-01D	TCGA-06-0137-01A-02R-0224-01	0.52	none	-0.0338	intact	4.6	0	0.6	0.59
		138	TCGA-06-0138-01A-01D	TCGA-06-0138-01A-01R-0233-01	0.21	none	0.0418	intact	3.5	0.4	0.4	0.4231
		139	TCGA-06-0139-01A-01D	TCGA-06-0139-01A-01R-0219-01	-0.6	none	0.0644	intact	0.1	0	0	0.0444
		140	TCGA-06-0140-01A-01D	TCGA-06-0140-01A-01R-0219-01	0.41		0.0467	intact	0.4	0	0.4	0.3802
		141	TCGA-06-0141-01A-01D	TCGA-06-0141-01A-01R-0219-01	-1.3	none	0.0795	intact	0.2	0	0.2	0.1562
		142	TCGA-06-0142-01A-01D	TCGA-06-0142-01A-01R-0219-01	0.66	none	0.0311	intact	1.9	0	0.1	0.0841
		143	TCGA-06-0143-01A-01D	TCGA-06-0143-01A-01R-0219-01	-0.05	none	0.0237	intact	5	1.7	0.4	0.4377
		145	TCGA-06-0145-01A-01D	TCGA-06-0145-01A-06R-0224-01	0.63	none	0.0143	intact	6.3	0	0.5	0.5092
		146	TCGA-06-0146-01A-01D	TCGA-06-0146-01A-01R-0280-01	0.6		0.015	intact	0	0	0.1	0.0386
		147	TCGA-06-0147-01A-01D	TCGA-06-0147-01A-01R-0219-01	-0.71	none	-0.1121	intact	0.2	0	0.2	0.2144
		148	TCGA-06-0148-01A-01D	TCGA-06-0148-01A-03R-0233-01	0.04	none	-0.0269	intact	5.7	0	0.6	0.5789
		149	TCGA-06-0149-01A-05D	TCGA-06-0149-01A-05R-0280-01	-0.94		-0.1408	intact	0.7	0	0.7	0.7501
		152	TCGA-06-0152-01A-02D	TCGA-06-0152-01A-02R-0306-01	0.02	none	-0.1838	intact	6	-0.2	0.2	0.2305
		154	TCGA-06-0154-01A-02D	TCGA-06-0154-01A-02R-0233-01	-0.18	none	-0.0134	intact	4	0	0.4	0.3615
		156	TCGA-06-0156-01A-01D	TCGA-06-0156-01A-01R-0233-01	0.27	none	0.0925	intact	1	1.3	0.4	0.3123
		157	TCGA-06-0157-01A-01D	TCGA-06-0157-01A-01R-0233-01	0.41	none	-0.0185	intact	4.5	0	0.5	0.4588
		158	TCGA-06-0158-01A-01D	TCGA-06-0158-01A-01R-0233-01	1.21	none	-0.0199	intact	4.6	0	0	0.0165
		160		TCGA-06-0160-01A-01R-0233-01	-0.04	none
		162	TCGA-06-0162-01A-01D	TCGA-06-0162-01A-01R-0280-01	-0.93		0.0017	intact	1.2	0	0	0.0182
		164	TCGA-06-0164-01A-01D	TCGA-06-0164-01A-01R-0280-01	-1.19		-0.471	loss	0.4	0	0.4	0.381
		166	TCGA-06-0166-01A-01D	TCGA-06-0166-01A-01R-0233-01	-1.56	none	-1.0202	del	0.2	0.7	0.1	0.0911
		167		TCGA-06-0167-01A-01R-0233-01	-0.39	none
		168	TCGA-06-0168-01A-01D	TCGA-06-0168-01A-01R-0233-01	0.03	none	0.0076	intact	0.4	0	0.4	0.3671
		169	TCGA-06-0169-01A-01D	TCGA-06-0169-01A-01R-0219-01	-0.63	none	0.0168	intact	4.7	0	0.4	0.3641
		171	TCGA-06-0171-01A-02D	TCGA-06-0171-01A-02R-0233-01	0.07	none	0.0495	intact	0.4	0.4	0.2	0.4275
		173	TCGA-06-0173-01A-01D	TCGA-06-0173-01A-01R-0233-01	0.91	none	0.2957	intact	4.5	0.8	0.5	0.5333
		174	TCGA-06-0174-01A-01D	TCGA-06-0174-01A-01R-0233-01	0.72	none	0.0091	intact	1.3	4.8	0.5	0.4877
		175	TCGA-06-0175-01A-01D	TCGA-06-0175-01A-01R-0280-01	-2.07		-0.5415	loss	0.4	0	0.4	0.4316
		176	TCGA-06-0176-01A-02D	TCGA-06-0176-01A-02R-0233-01	-1.01	none	0.0206	intact	0.4	0	0.4	0.3561
		177	TCGA-06-0177-01A-01D	TCGA-06-0177-01A-01R-0280-01	-0.28		-0.2033	loss	0.5	3.5	0.5	0.4892
		178	TCGA-06-0178-10B-01D	TCGA-06-0178-01A-01R-0233-01	0.03	none	0.0365	intact	0	0	0	-0.016
		179	TCGA-06-0179-01A-02D	TCGA-06-0179-01A-02R-0280-01	-0.6		-0.0219	intact	3.4	0	0.2	0.2155
		182	TCGA-06-0182-01A-01D	TCGA-06-0182-01A-01R-0280-01	-0.32		0.011	intact	5.1	0.3	0.5	0.4956
		184	TCGA-06-0184-01A-01D	TCGA-06-0184-01A-01R-0233-01	-1.39	validated	-0.4312	loss	0.7	0	1.1	0.6301
		185	TCGA-06-0185-01A-01D	TCGA-06-0185-01A-01R-0233-01	0.21	none	-0.0495	intact	4.6	0	0.5	0.4725
		187	TCGA-06-0187-01A-01D	TCGA-06-0187-01A-01R-0233-01	-0.29	none	-0.1605	intact	5.7	0	0.5	0.4488
		188	TCGA-06-0188-01A-01D	TCGA-06-0188-01A-01R-0233-01	1.04	none	0.28	intact	0.4	0	0.4	0.4055
		189	TCGA-06-0189-01A-01D	TCGA-06-0189-01A-05R-0233-01	-1.28	none	-0.0305	intact	0.1	0	0.1	0.1349
		190	TCGA-06-0190-01A-01D	TCGA-06-0190-01A-01R-0233-01	-0.59	validated	-0.2124	loss	0.3	0.3	0.3	0.3486
		192	TCGA-06-0192-01B-01D	TCGA-06-0192-01B-01R-0338-01	-1.68		-0.4631	loss	0.4	1.6	0.2	0.2098
		194	TCGA-06-0194-01A-01D	TCGA-06-0194-01A-01R-0280-01	-1.15		0.008	intact	1.2	0	0.3	0.3345
		195	TCGA-06-0195-01B-01D	TCGA-06-0195-01B-01R-0233-01	0.78	none	0.1893	intact	3.9	0.6	0.5	0.5166
		197	TCGA-06-0197-01A-02D	TCGA-06-0197-01A-02R-0233-01	-1.18	none	-0.1504	intact	0.4	0	0.4	0.4039
		201	TCGA-06-0201-01A-01D	TCGA-06-0201-01A-01R-0233-01	-0.96	validated	-0.0282	intact	0.3	0	0.3	0.2979
		206	TCGA-06-0206-01A-01D	TCGA-06-0206-01A-01R-0233-01	-1.57	none	-1.2998	del	0.7	0	0.7	0.663
		208	TCGA-06-0208-01A-01D	TCGA-06-0208-01B-01R-0233-01	-0.87	unvalidated	-0.5319	loss	4	0	0.4	0.4086
		210	TCGA-06-0210-01A-01D	TCGA-06-0210-01A-01R-0233-01	-0.81	none	0.0182	intact	0.4	1.3	0.4	0.3938
		211	TCGA-06-0211-01B-01D	TCGA-06-0211-01A-01R-0233-01	0.31	none	-0.0255	intact	5	1.4	0.4	0.4476
		213	TCGA-06-0213-01A-01D	TCGA-06-0213-01A-01R-0233-01	-0.41	none	-0.0154	intact	0.7	0	0.7	0.6627
		214	TCGA-06-0214-01A-02D	TCGA-06-0214-01A-02R-0233-01	0.4	validated	-0.0112	intact	2.9	2.7	0.4	0.3976
		216	TCGA-06-0216-01B-01D	TCGA-06-0216-01B-01R-0338-01	1.02	none	0.0636	intact	3.5	-0.2	0.5	0.4632
		219	TCGA-06-0219-01A-01D	TCGA-06-0219-01A-01R-0233-01	0.54	none	0.0347	intact	3.9	0	0	0.0415
		221	TCGA-06-0221-01A-01D	TCGA-06-0221-01A-01R-0233-01	0.11	none	0.0372	intact	-0.1	1.6	0.4	-0.0172
		237	TCGA-06-0237-01A-02D	TCGA-06-0237-01A-02R-0233-01	-0.06	none	0.0452	intact	2.5	0	0.6	0.5539
		238	TCGA-06-0238-01A-02D	TCGA-06-0238-01A-02R-0306-01	-0.43	none	0.001	intact	0.4	0	0.4	0.3747
		240		TCGA-06-0240-01A-02R-0233-01	-0.3	none
		241	TCGA-06-0241-01A-02D	TCGA-06-0241-01A-02R-0233-01	0.4	none	0.0209	intact	0.5	6.3	0.5	0.5219
		244	TCGA-08-0244-01A-01G	TCGA-08-0244-01A-01R-0298-01	0.46	none	-0.0012	intact	4.1	0	0.5	0.4525
		245	TCGA-08-0245-01A-01G	TCGA-08-0245-01A-01R-0298-01	1.01	none	-0.026	intact	0.5	4.2	0.1	0.0918
		246	TCGA-08-0246-01A-01G	TCGA-08-0246-01A-01R-0298-01	0.38	none	0.0626	intact	3.6	0.3	0.1	0.0526
		258	TCGA-02-0258-01A-01D	TCGA-02-0258-01A-01R-0280-01	1.09		-0.1675	intact	0	0	0.6	0.0276
		260	TCGA-02-0260-01A-03D	TCGA-02-0260-01A-03R-0280-01	0.7		-0.0699	intact	5.1	0	0.5	0.5081
		266	TCGA-02-0266-01A-01D	TCGA-02-0266-01A-01R-0280-01	-1.44		0.1063	intact	0.7	0	0.7	0.7169
		269	TCGA-02-0269-01B-01D	TCGA-02-0269-01B-01R-0280-01	0.77		-0.1075	intact	5	0	0.5	0.5007
		271	TCGA-02-0271-01A-01D	TCGA-02-0271-01A-01R-0280-01	-1.43		-0.0435	intact	0.7	0	0.7	0.7122
		281	TCGA-02-0281-01A-01D	TCGA-02-0281-01A-01R-0280-01	1.79		0.1141	intact	0.2	0.6	2.9	0.1552
		285	TCGA-02-0285-01A-01D	TCGA-02-0285-01A-01R-0280-01	-0.25		-0.0545	intact	4.8	0.5	0.6	0.5276
		289	TCGA-02-0289-01A-01D	TCGA-02-0289-01A-01R-0280-01	-0.12		-0.0347	intact	5.9	0.6	0.5	0.5028
		290	TCGA-02-0290-01A-01D	TCGA-02-0290-01A-01R-0280-01	0.74		-0.0633	intact	5.3	0	0.5	0.4828
		317	TCGA-02-0317-01A-01D	TCGA-02-0317-01A-01R-0280-01	-0.03		-0.0302	intact	4.5	0	0.9	0.8611
		321	TCGA-02-0321-01A-01D	TCGA-02-0321-01A-01R-0280-01	-0.71		0.0108	intact	0.3	0	0.2	0.2211
		324	TCGA-02-0324-01A-01D	TCGA-02-0324-01A-01R-0280-01	-1.33		-0.7232	loss	0.4	0	0.4	0.4237
		325	TCGA-02-0325-01A-01D	TCGA-02-0325-01A-01R-0280-01	1.15		0.0432	intact	0.3	0	0.3	0.2737
		326	TCGA-02-0326-01A-01D	TCGA-02-0326-01A-01R-0280-01	-0.02		0.0023	intact	0.3	0	0.3	0.3288
		330	TCGA-02-0330-01A-01D	TCGA-02-0330-01A-01R-0280-01	0.06		-0.0437	intact	0.4	0	0.4	0.3651
		332	TCGA-02-0332-01A-01D	TCGA-02-0332-01A-01R-0280-01	-0.57		-0.0085	intact	0.3	0	0.3	0.2696
		333	TCGA-02-0333-01A-02D	TCGA-02-0333-01A-02R-0280-01	0.95		0.0159	intact	5.1	0	0	0.0404
		337	TCGA-02-0337-01A-01D	TCGA-02-0337-01A-01R-0280-01	-0.35		-0.0135	intact	0.3	0	0.3	0.3048
		338	TCGA-02-0338-01A-01D	TCGA-02-0338-01A-01R-0280-01	-0.05		-0.0235	intact	0	0	0	0.0296
		339	TCGA-02-0339-01A-01D	TCGA-02-0339-01A-01R-0280-01	1.77		-0.0098	intact	0.1	3	0.1	0.0657
		344	TCGA-08-0344-01A-01D	TCGA-08-0344-01A-01R-0298-01	4.37	none	0.0552	intact	0	0	0	0.0383
		345	TCGA-08-0345-01A-01D	TCGA-08-0345-01A-01R-0306-01	0.04	none	0.0169	intact	0.3	0	3.6	0.2982
		346	TCGA-08-0346-01A-01G	TCGA-08-0346-01A-01R-0298-01	-1.15	unvalidated	-0.3952	loss	0.3	0	0.3	0.2899
		347	TCGA-08-0347-01A-01G	TCGA-08-0347-01A-01R-0298-01	0.69	none	0.0031	intact	0.4	2.5	0.4	0.3886
		348	TCGA-08-0348-01A-01G	TCGA-08-0348-01A-01R-0298-01	0.34	none	0.046	intact	0.4	0	0.4	0.4423
		349	TCGA-08-0349-01A-01D	TCGA-08-0349-01A-01R-0306-01	-0.49	none	0.0714	intact	3.9	0	0.4	0.4299
		350	TCGA-08-0350-01A-01D	TCGA-08-0350-01A-01R-0298-01	0.4	none	0.0482	intact	0	0	0	-0.0161
		351	TCGA-08-0351-01A-01D	TCGA-08-0351-01A-01R-0298-01	2.08	none	0.0527	intact	0	0	0	0.0012
		352	TCGA-08-0352-01A-01D	TCGA-08-0352-01A-01R-0306-01	-0.11	unvalidated	0.0327	intact	5.8	-0.1	0.5	0.4712
		353	TCGA-08-0353-01A-01G	TCGA-08-0353-01A-01R-0298-01	-1.03	none	-0.5062	loss	4.3	0.4	0	0.1739
		354	TCGA-08-0354-01A-01D	TCGA-08-0354-01A-01R-0298-01	-0.14	none	0.0166	intact	4.2	0	0.7	0.6582
		355	TCGA-08-0355-01A-01G	TCGA-08-0355-01A-01R-0298-01	-0.21	none	0.1044	intact	4.2	0	0	0.115
		356	TCGA-08-0356-01A-01G	TCGA-08-0356-01A-01R-0298-01	-0.38	none	-0.0138	intact	4.2	0	0.4	0.3677
		357	TCGA-08-0357-01A-01G	TCGA-08-0357-01A-01R-0298-01	1.44	none	-0.0042	intact	3.9	0	0.4	0.43
		358	TCGA-08-0358-01A-01D	TCGA-08-0358-01A-01R-0306-01	-0.12	none	-0.0388	intact	5.2	0	0.8	0.7363
		359	TCGA-08-0359-01A-01G	TCGA-08-0359-01A-01R-0298-01	0.54	none	0.0278	intact	0.4	0	0.4	0.4068
		360	TCGA-08-0360-01A-01G	TCGA-08-0360-01A-01R-0298-01	0.12	none	0.0576	intact	1.4	0	0.3	0.3103
		373	TCGA-08-0373-01A-01D	TCGA-08-0373-01A-01R-0306-01	-0.06	none	0.0093	intact	0.2	0	0.2	0.2133
		375	TCGA-08-0375-01A-01D	TCGA-08-0375-01A-01R-0298-01	1.38	none	-0.0072	intact	4.2	-0.1	0.4	0.4478
		380	TCGA-08-0380-01A-01D	TCGA-08-0380-01A-01R-0298-01	-0.92	none	0.0114	intact	0.4	0	0.4	0.3887
		385		TCGA-08-0385-01A-01R-0298-01	3.14	none
		386	TCGA-08-0386-01A-01D	TCGA-08-0386-01A-01R-0306-01	0.62	none	-0.2012	loss	0.7	-0.2	0.4	0.412
		389	TCGA-08-0389-01A-01G	TCGA-08-0389-01A-01R-0298-01	0.09	none	0.0571	intact	0.3	0	0.5	0.4841
		390	TCGA-08-0390-01A-01G	TCGA-08-0390-01A-01R-0298-01	-1.17	unvalidated	-0.2729	loss	1.2	0	0.3	0.2914
		392	TCGA-08-0392-01A-01G	TCGA-08-0392-01A-01R-0298-01	-1.04	none	-0.0286	intact	0.3	0	0.3	0.3147
		394	TCGA-06-0394-01A-01D	TCGA-06-0394-01A-01R-0280-01	-1.21		0.0063	intact	0.2	0	0.2	0.2416
		397	TCGA-06-0397-01A-01D	TCGA-06-0397-01A-01R-0280-01	-1.7		-0.6911	loss	0.4	0	0.4	0.4403
		402	TCGA-06-0402-01A-01D	TCGA-06-0402-01A-01R-0280-01	0.17		-0.0129	intact	4.9	1.5	0.2	0.1963
		409	TCGA-06-0409-01A-02D	TCGA-06-0409-01A-02R-0280-01	-0.12		0.0129	intact	4.7	0	0.4	0.4234
		410	TCGA-06-0410-01A-01D	TCGA-06-0410-01A-01R-0280-01	1.32		0.2143	intact	-0.3	3.2	1.4	-0.2673
		412	TCGA-06-0412-01A-01D	TCGA-06-0412-01A-01R-0280-01	0.19		-0.019	intact	3.9	0.7	0.7	0.6796
		413	TCGA-06-0413-01A-01D	TCGA-06-0413-01A-01R-0280-01	0.47		-0.0153	intact	0.5	0	3.3	0.4753
		414	TCGA-06-0414-01A-01D	TCGA-06-0414-01A-01R-0280-01	1.23		0.02	intact	0	-0.3	0	0.0394
		422	TCGA-02-0422-01A-01D	TCGA-02-0422-01A-01R-0280-01	0.03		-0.0178	intact	4.4	0	0.4	0.4017
		430	TCGA-02-0430-01A-01D	TCGA-02-0430-01A-01R-0280-01	0.08		-0.0308	intact	5.3	0	0.5	0.4945
		432	TCGA-02-0432-01A-02D	TCGA-02-0432-01A-02R-0280-01	1.34		0.0475	intact	0.1	0	0.1	0.0964
		439	TCGA-02-0439-01A-01D	TCGA-02-0439-01A-01R-0280-01	1.89		0.3782	intact	1.2	0	0.4	0.3985
		440	TCGA-02-0440-01A-01D	TCGA-02-0440-01A-01R-0280-01	0.62		-0.0093	intact	0.4	4.4	0.4	0.3545
		446	TCGA-02-0446-01A-01D	TCGA-02-0446-01A-01R-0280-01	-0.27		0.0264	intact	0.4	4.4	0.4	0.4179
		451	TCGA-02-0451-01A-01D	TCGA-02-0451-01A-01R-0280-01	-0.05		-0.0204	intact	5.2	0	0.4	0.3911
		456	TCGA-02-0456-01A-01D	TCGA-02-0456-01A-01R-0280-01	-1.04		-0.231	loss	0.1	0	0.1	0.1469
		509	TCGA-08-0509-01A-01D	TCGA-08-0509-01A-01R-0280-01	-0.08		-0.006	intact	0.3	0	0.3	0.2994
		510	TCGA-08-0510-01A-01D	TCGA-08-0510-01A-01R-0280-01	-1.25		-0.5679	loss	0.5	0	0.5	0.4651
		511	TCGA-08-0511-01A-01D	TCGA-08-0511-01A-01R-0280-01	0.28		-0.0866	intact	4.2	0	0	0.4214
		512	TCGA-08-0512-01A-01D	TCGA-08-0512-01A-01R-0280-01	-1.84		-0.3282	loss	0	0	0	0.03
		514	TCGA-08-0514-01A-01D	TCGA-08-0514-01A-01R-0280-01	0.2		-0.0364	intact	4.3	0.1	0	-0.0026
		516	TCGA-08-0516-01A-01D	TCGA-08-0516-01A-01R-0280-01	3.14		-0.0518	intact	-0.3	0.3	-0.3	-0.3476
		517	TCGA-08-0517-01A-01D	TCGA-08-0517-01A-01R-0280-01	1.6		0.0167	intact	-0.7	0	0.1	0.0631
		518	TCGA-08-0518-01A-01D	TCGA-08-0518-01A-01R-0280-01	1.16		-0.0444	intact	2.9	0	0.5	0.4987
		520	TCGA-08-0520-01A-01D	TCGA-08-0520-01A-01R-0280-01	0.14		0.0284	intact	0.5	0	0.5	0.455
		521	TCGA-08-0521-01A-01D	TCGA-08-0521-01A-01R-0280-01	0.11		-0.0194	intact	0.1	0	0	0.0525
		522	TCGA-08-0522-01A-01D	TCGA-08-0522-01A-01R-0280-01	-0.72		-0.2425	loss	0.3	-0.1	0.3	0.3482
		524	TCGA-08-0524-01A-01D	TCGA-08-0524-01A-01R-0280-01	1.02		0.0142	intact	0	5.5	0.3	-0.0016
		525	TCGA-08-0525-01A-01D	TCGA-08-0525-01A-01R-0280-01	0.05		0.0217	intact	5.5	-0.5	0.3	0.5236
		529	TCGA-08-0529-01A-02D	TCGA-08-0529-01A-02R-0280-01	0.22		-0.0371	intact	5.1	0	1	0.7661
		531	TCGA-08-0531-01A-01D	TCGA-08-0531-01A-01R-0280-01	-0.1		-0.0797	intact	5.5	0.1	0.4	0.3942
		615	TCGA-12-0615-01A-01D	TCGA-12-0615-01A-01R-0306-01	-0.85	none	0.0768	intact	3.9	0	0	0.0164
		616	TCGA-12-0616-01A-01D	TCGA-12-0616-01A-01R-0306-01	-0.2	none	0.039	intact	2.5	0.4	2.7	0.1066
		618	TCGA-12-0618-01A-01D	TCGA-12-0618-01A-01R-0306-01	0.01	none	0.0269	intact	0.4	-0.1	0.4	0.3811
		619	TCGA-12-0619-01A-01D	TCGA-12-0619-01A-01R-0306-01	-1.14	none	-0.3535	loss	4.5	-0.2	0.4	0.3528
		620	TCGA-12-0620-01A-01D	TCGA-12-0620-01A-01R-0306-01	-1.04	unvalidated	0.0352	intact	0.3	0	0.3	0.3192
		644	TCGA-06-0644-01A-02D	TCGA-06-0644-01A-02R-0306-01	-0.8	none	-0.1226	intact	0.5	0	0.5	0.4706
		645	TCGA-06-0645-01A-01D	TCGA-06-0645-01A-01R-0306-01	-0.5	none	0.0083	intact	4.7	-0.1	0.4	0.4349
		646	TCGA-06-0646-01A-01D	TCGA-06-0646-01A-01R-0306-01	0.62	none	0.0039	intact	3.5	0	0.4	0.3803
		648	TCGA-06-0648-01A-01D	TCGA-06-0648-01A-01R-0306-01	-0.17	none	0.0286	intact	0.4	0	0.4	0.4013
		649	TCGA-06-0649-01B-01D	TCGA-06-0649-01B-01R-0338-01	0.12		0.0294	intact	0.3	0.4	0.3	0.3153
		653	TCGA-12-0653-01B-01D	TCGA-12-0653-01A-01R-0338-01	0.3		0.0274	intact	0.4	0	0.4	0.4345
		654	TCGA-12-0654-01B-01D	TCGA-12-0654-01B-01R-0338-01	-0.45		-0.0055	intact	0.6	0	0.6	0.6429
		656	TCGA-12-0656-01A-03D	TCGA-12-0656-01B-01R-0338-01	0.1		-0.0314	intact	0.4	0	0.4	0.3834
		657	TCGA-12-0657-01A-01D	TCGA-12-0657-01A-01R-0338-01	-0.04		-0.01	intact	3.8	0	0.4	0.4452
		662	TCGA-12-0662-01A-01D	TCGA-12-0662-01A-01R-0338-01	-0.67		0.005	intact	4.1	-0.1	0.4	0.4074
		686	TCGA-06-0686-01A-01D	TCGA-06-0686-01A-01R-0338-01	0.16		0.0449	intact	0.6	0	0.7	0.6636
		688	TCGA-12-0688-01A-02D	TCGA-12-0688-01A-02R-0338-01	-0.67		-0.0168	intact	4.7	0	0.4	0.4214
		691	TCGA-12-0691-01A-01D	TCGA-12-0691-01A-01R-0338-01	0		0.0244	intact	0.5	0	0	0.4633
		692	TCGA-12-0692-01A-01D	TCGA-12-0692-01A-01R-0338-01	0.58		-0.0125	intact	0.4	1	0.4	0.4195
		703	TCGA-12-0703-01A-02D	TCGA-12-0703-01A-02R-0338-01	-1.26		-0.4987	loss	0.4	0	0.4	0.4278
		707	TCGA-12-0707-01A-01D	TCGA-12-0707-01A-01R-0338-01	0.41		0.0111	intact	5.7	0	0.4	0.4361
		742	TCGA-15-0742-01A-01D	TCGA-15-0742-01A-01R-0338-01	0.7		-0.0429	intact	4.4	0	0.5	0.4943
		743	TCGA-06-0743-01A-01D	TCGA-06-0743-01A-01R-0338-01	0.22		0.1186	intact	4.4	1	0.4	0.3896
		744	TCGA-06-0744-01A-01D	TCGA-06-0744-01A-01R-0338-01	-0.23		-0.1637	intact	6.8	0.1	0.5	0.4673
		745	TCGA-06-0745-01A-01D	TCGA-06-0745-01A-01R-0338-01	0.35		0.0497	intact	5.7	0	0.5	0.4543
		747	TCGA-06-0747-01A-01D	TCGA-06-0747-01A-01R-0338-01	0.24		-0.0135	intact	5.4	0	0.5	0.4573
		749	TCGA-06-0749-01A-01D	TCGA-06-0749-01A-01R-0338-01	-0.19		0.0146	intact	0.3	0	0.4	0.3579
		750	TCGA-06-0750-01A-01D	TCGA-06-0750-01A-01R-0338-01	-0.14		0.0008	intact	4.4	0	0.4	0.4063
		769	TCGA-12-0769-01A-01D	TCGA-12-0769-01A-01R-0338-01	0.33		-0.0215	intact	5.1	0	0.5	0.4636
		772	TCGA-12-0772-01A-01D	TCGA-12-0772-01A-01R-0338-01	-0.73		-0.2165	loss	0.4	0	0.4	0.4255
		773	TCGA-12-0773-01A-01D	TCGA-12-0773-01A-01R-0338-01	-0.61		-0.0117	intact	0.7	0	0.7	0.7335
		775	TCGA-12-0775-01A-01D	TCGA-12-0775-01A-01R-0338-01	-0.94		-0.2485	loss	0.3	0	0.3	0.2673
		776	TCGA-12-0776-01A-01D	TCGA-12-0776-01A-01R-0338-01	-0.13		0.0221	intact	0.9	0	0.3	0.3364
		778	TCGA-12-0778-01A-01D	TCGA-12-0778-01A-01R-0338-01	-0.07		-0.0103	intact	4.1	0	0.4	0.3469
		780	TCGA-12-0780-01A-01D	TCGA-12-0780-01A-01R-0338-01	-0.36		-0.0287	intact	0.9	0	3.1	0.4475
		Mutations are denoted in blue and designated “validated” and “unvalidated” according to whether TCGA reports that the mutation was verified by second sequencing method or whether such verification is pending. Focal amplifications in red and single-copy loss or homozygous deletion (light and dark green, respectively) are inferred from array-CGH log2 ratios (see Methods). Cluster assignments are de…
